# Supplementary material for: Molecular architecture of black widow spider neurotoxins
Source: PubMed Central journal article supplement (PMC8630228; doi:10.1038/s41467-021-26562-8), 2021-11-29
Supplement: 41467_2021_26562_MOESM1_ESM.pdf [file 41467_2021_26562_MOESM1_ESM.pdf]

**Supplementary Information**

**of**

**Molecular architecture of black widow spider neurotoxins**

Minghao Chen, Daniel Blum, Lena Engelhard, Stefan Raunser, Richard Wagner and  
Christos Gatsogiannis

**Contents:**

1. Supplementary Figures
2. Supplementary Tables
3. Supplementary References

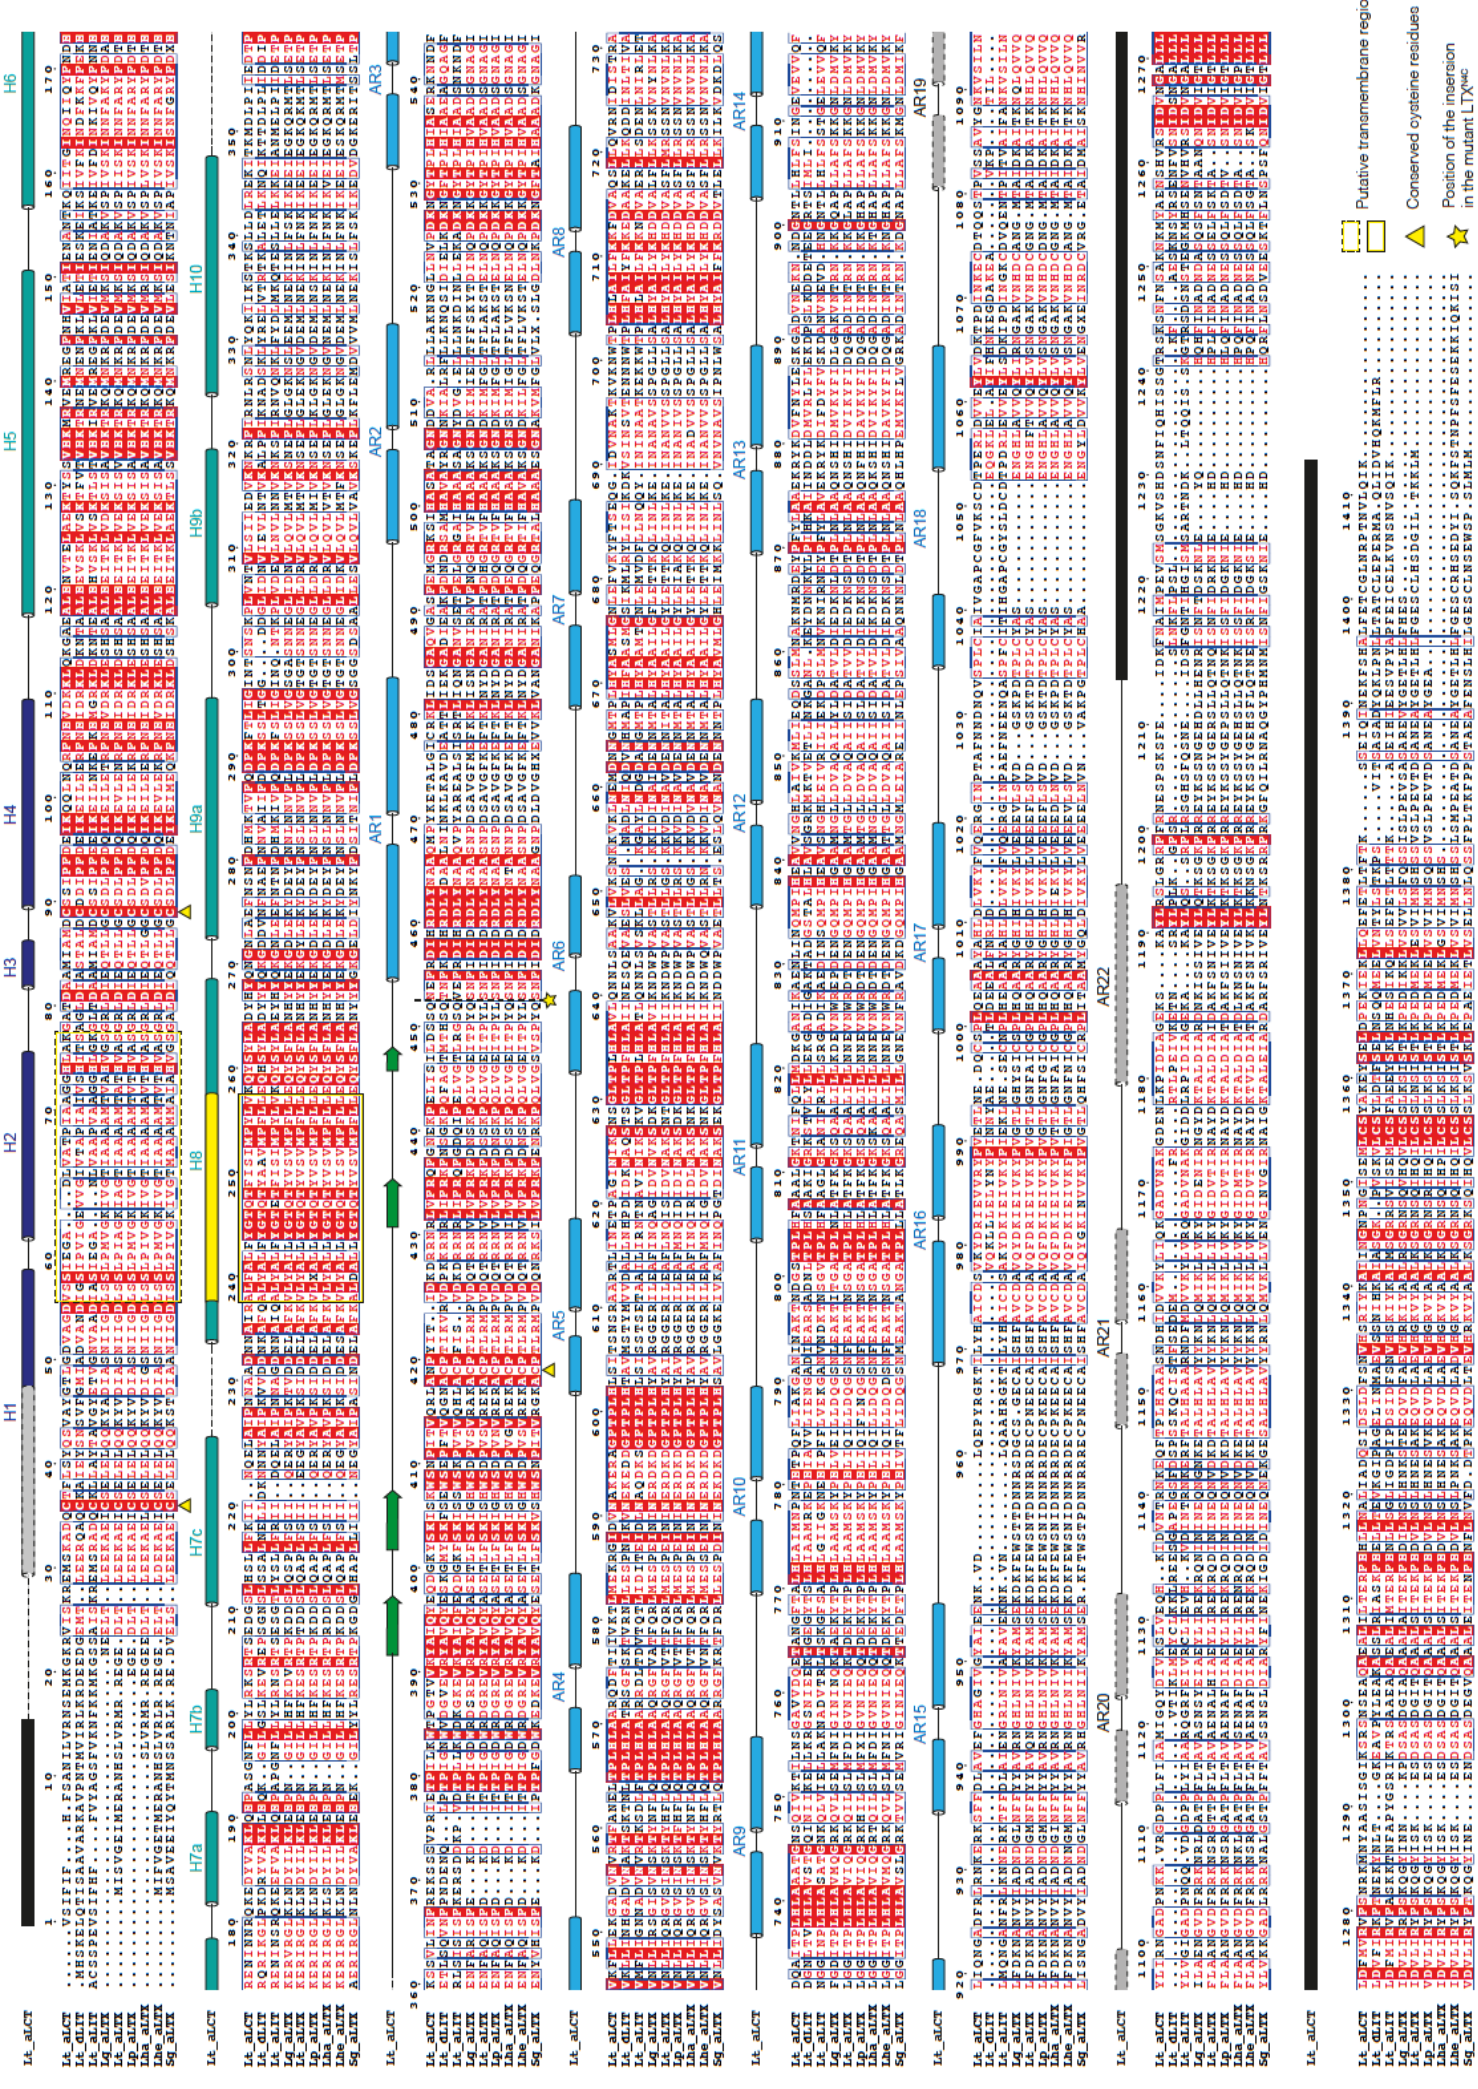

Putative transmembrane region  
▲ Conserved cysteine residues  
★ Position of the insertion in the mutant LTYwc

**Supplementary Figure 1. Sequence alignment of latrotoxin protein sequences.** Lt\_αLCT, α-latrocrustatoxin from *Latrodectus tredecimguttatus* (Mediterranean black widow), UniprotKB ID: Q9XZC0 (LCTA\_LATTR), same below. Lt\_δLIT, δ-latroinsectotoxin from *L. tredecimguttatus*, Q25338 (LITD\_LATTR). Lt\_αLIT, α-latroinsectotoxin from *L. tredecimguttatus*, Q02989 (LITA\_LATTR). Lg\_αLTX, α-latrotoxin from *Latrodectus geometricus* (brown widow), L7XCU0 (L7XCU0\_LATGE). Lt\_αLTX, α-latrotoxin from *L. tredecimguttatus*, P23631 (LATA\_LATTR). Lp\_αLTX, α-latrotoxin from *Latrodectus pallidus* (white widow spider), L7XDS4 (L7XDS4\_9ARAC). Lha\_αLTX, α-latrotoxin from *Latrodectus hasselti* (redback spider), G0LXV8 (LATA\_LATHA). Lhe\_αLTX, α-latrotoxin from *Latrodectus hesperus* (western black widow), P0DJE3 (LATA\_LATHE). Sg\_αLTX, α-latrotoxin from *Steatoda grossa* (brown house spider), L7X8P2 (L7X8P2\_STEGR). The secondary structure of α-LCT is shown at the top. Dashed lines or black boxes indicate disorder and/or flexible regions not included in the α-LCT model.

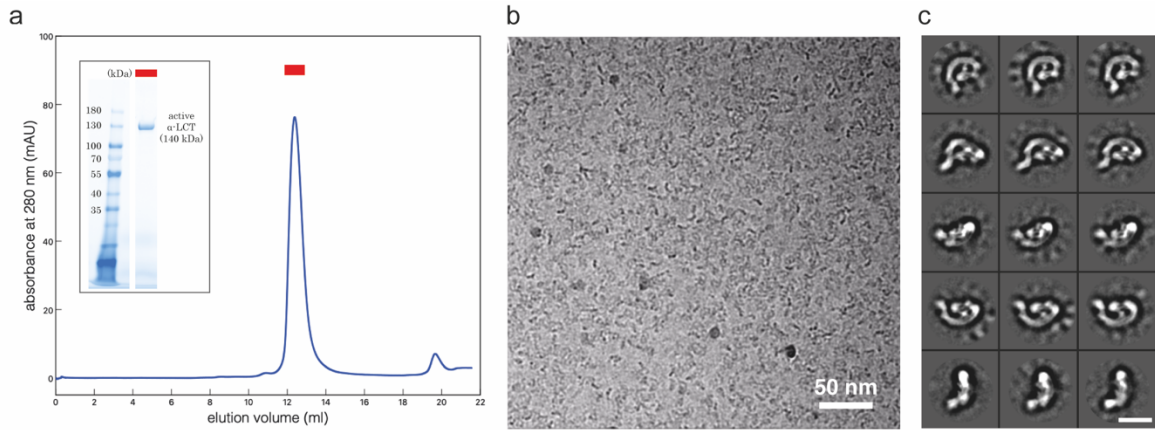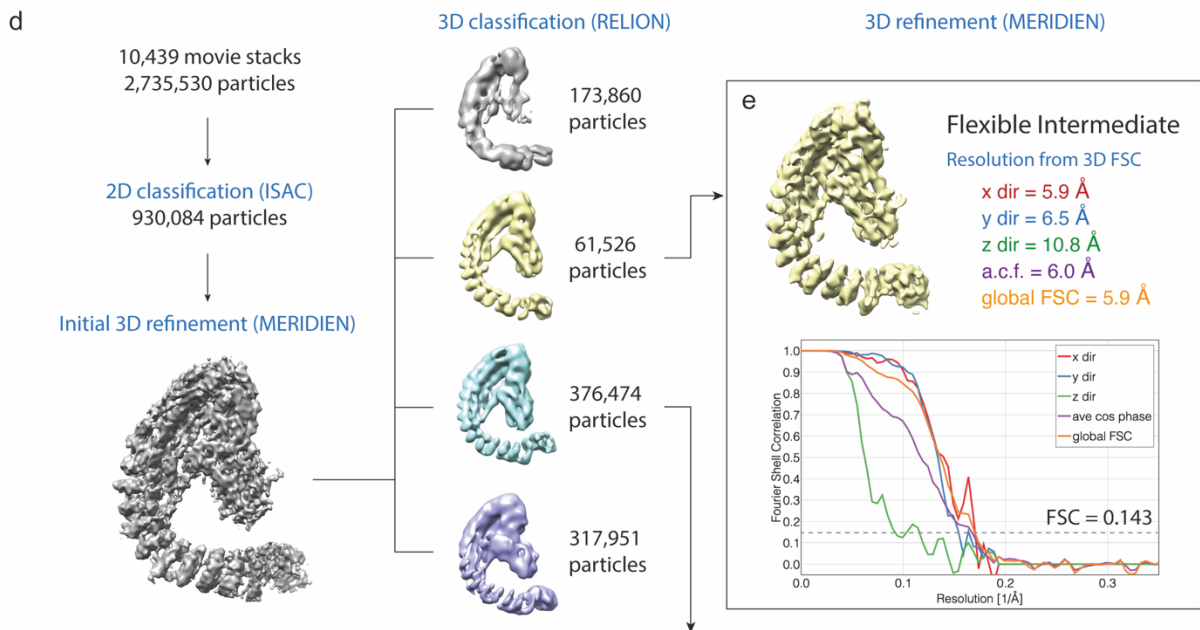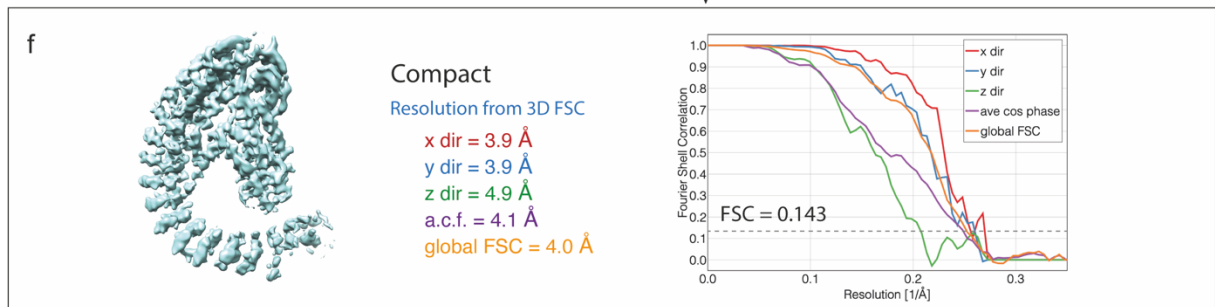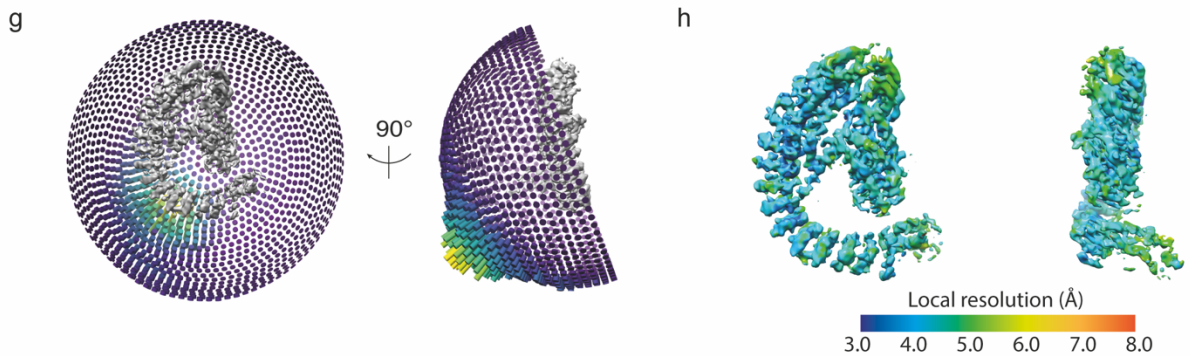

**Supplementary Figure 2. CryoEM sample preparation, image acquisition, and data processing of mature, truncated  $\alpha$ -LCT.** **a**, Size exclusion chromatography (SEC) profile of  $\alpha$ -LCT, showing only one peak corresponding to the monomer. The inset shows an SDS-PAGE of the peak (red bar). A total of  $n=9$  equivalent experiment have been conducted. **b**, A representative cryoEM micrograph of  $\alpha$ -LCT. A total of  $n=10,439$  equivalent images have been collected. **c**, Representative reference-free 2D class averages. Scale bar: 10 nm **d**, Flowchart of  $\alpha$ -LCT cryoEM data processing workflow. See 'data processing' section in Methods for details. **e, f**, 3D FSCs and final unprocessed EM maps of a flexible intermediate (e) and the best resolved compact conformation (f) of  $\alpha$ -LCT monomer, respectively. **g**, Angular distribution for the final reconstruction of compact  $\alpha$ -LCT. **h**, EM map of compact  $\alpha$ -LCT colored by local resolution.

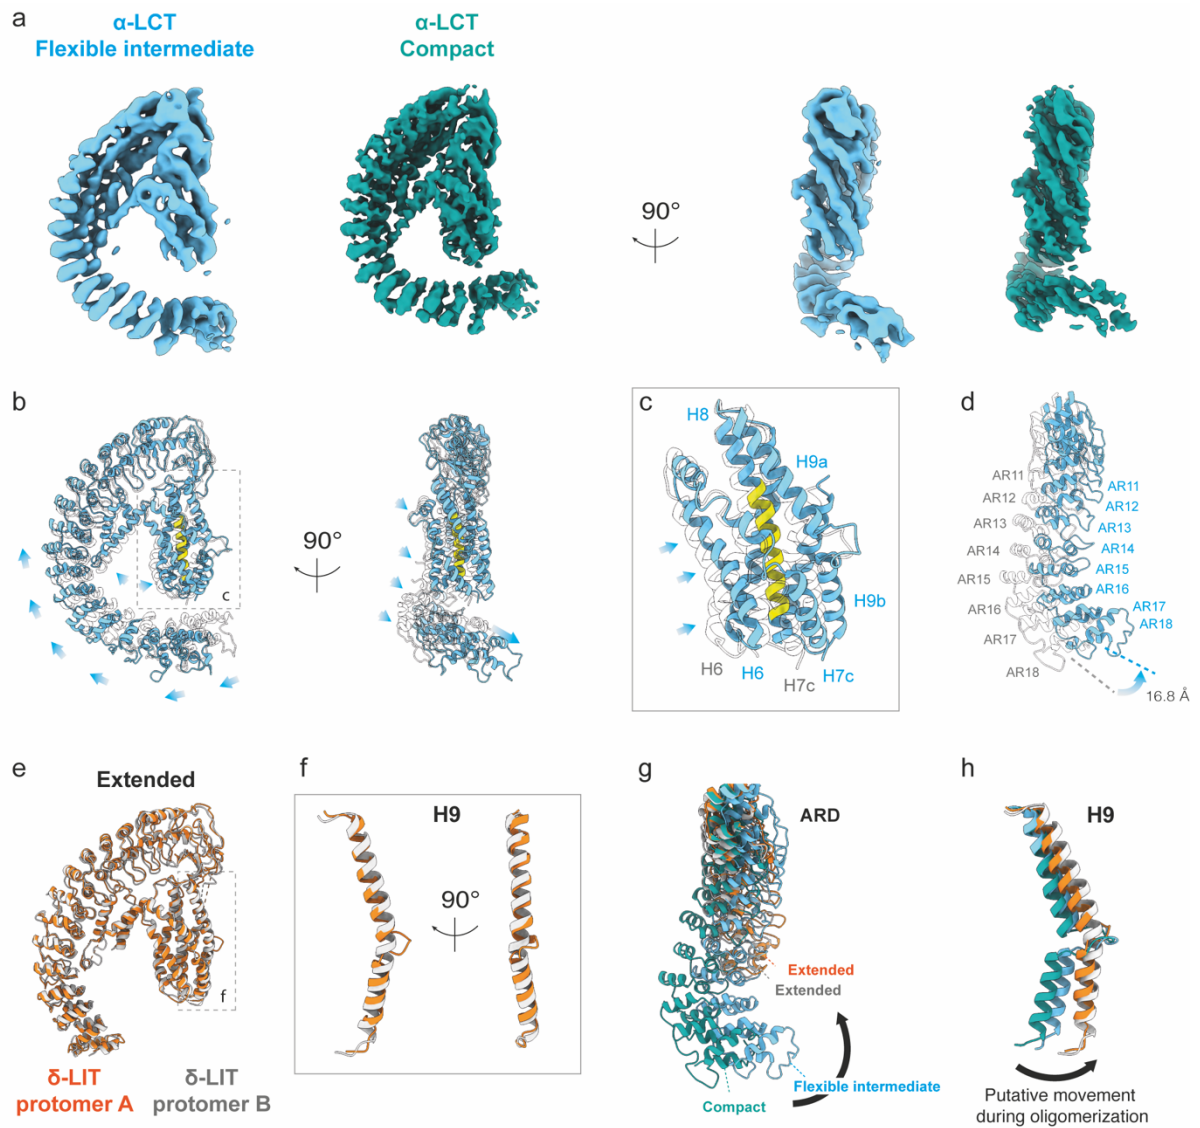

**Supplementary Figure 3. Different conformations of LaTX protomers.** **a**, Side by side comparison of the EM maps of the  $\alpha$ -LCT monomer in the intermediate (cyan) contoured at  $7\sigma$  and compact conformation (sea green) contoured at  $16\sigma$ . **b**, Molecular model of the  $\alpha$ -LCT intermediate superimposed with the compact conformation (transparent). Arrows indicate domain movement from the compact to the flexible intermediate intermediate conformation. **c**, **d**, Magnified view of the helical bundle domains (**c**) and the terminal ARs (**d**) 11-18. **e**, Comparison of the two protomers of the  $\delta$ -LIT dimer. Protomer A: orange; Protomer B: gray. **f**, Magnified view of the helix H9. **g**, **h**, Comparison of the AR-domains (ARD) and helix H9 of all four conformations, respectively.

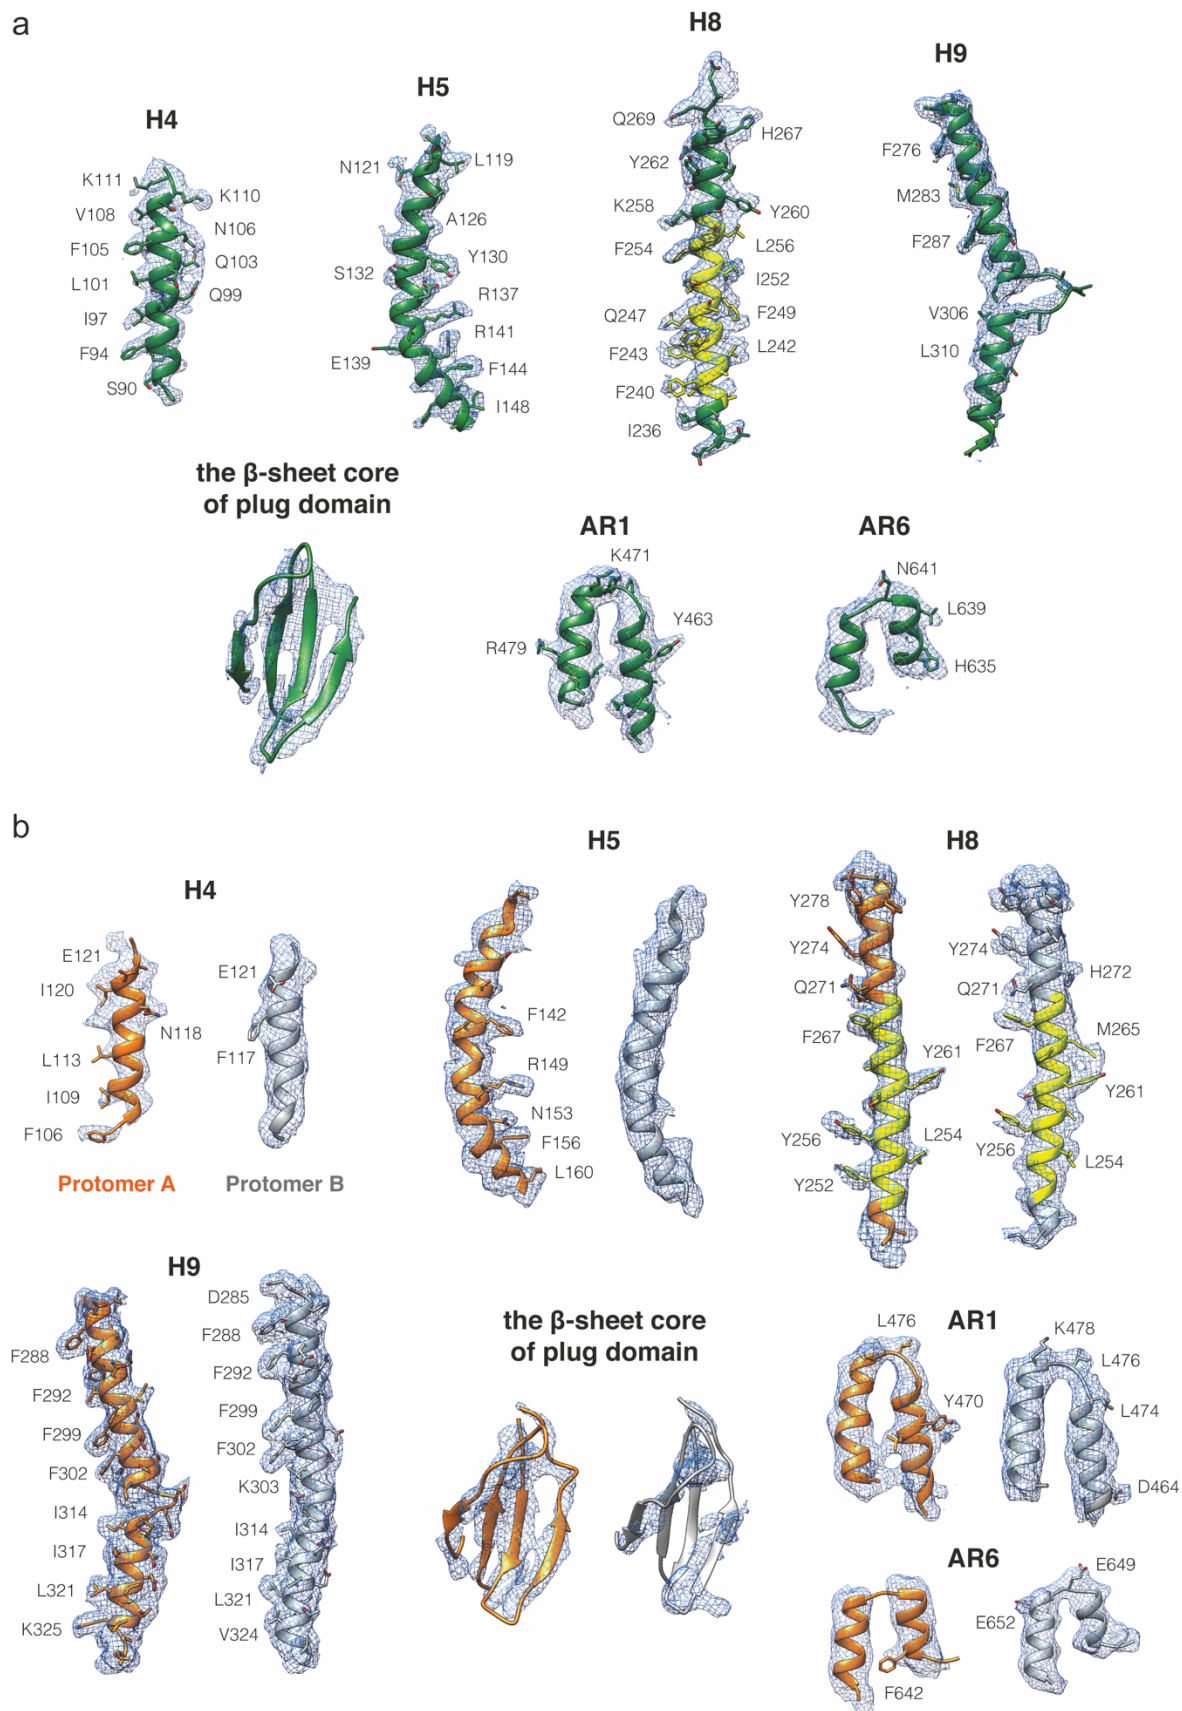

**Supplementary Figure 4. CryoEM densities of  $\alpha$ -LCT and  $\delta$ -LIT.** Superposition of segments of the molecular model of  $\alpha$ -LCT(a) and  $\delta$ -LIT (b) with the cryoEM densities. The maps are shown as blue mesh with contour level of  $13\sigma$  and  $10\sigma$  for  $\alpha$ -LCT and  $\delta$ -LIT, respectively.

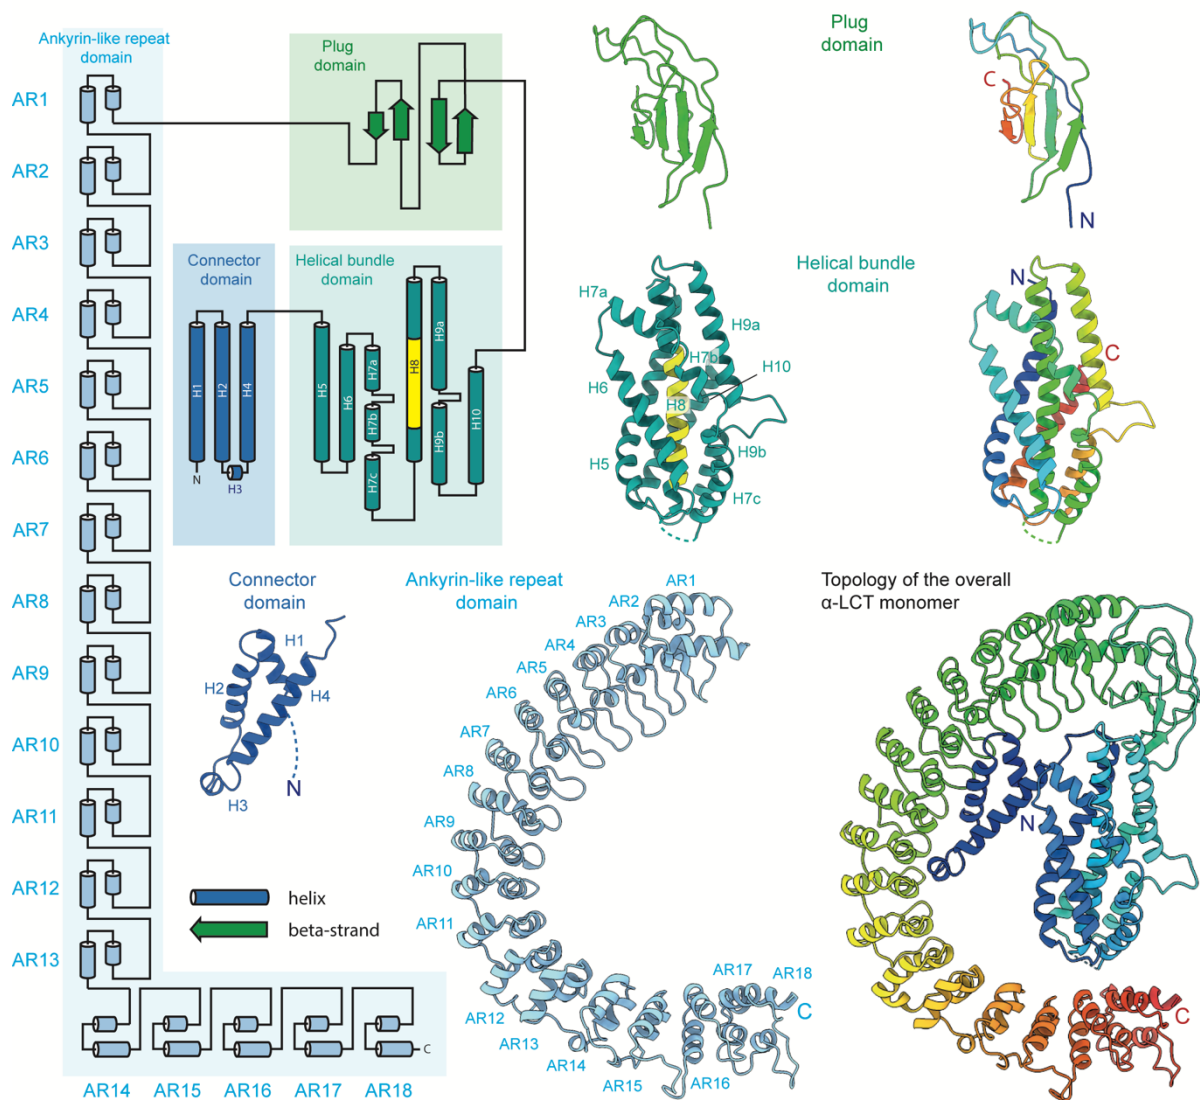

**Supplementary Figure 5. Topology diagram of  $\alpha$ -LCT.** The connector domain (blue), helical bundle domain (sea green), transmembrane region (yellow), plug domain (green) and ankyrin-like repeat domain (cyan) are shown together with the respective molecular models. The models of plug domain, helical bundle domain, and the overall  $\alpha$ -LCT monomer are colored with a rainbow spectrum (N-terminal blue; C-terminal red).



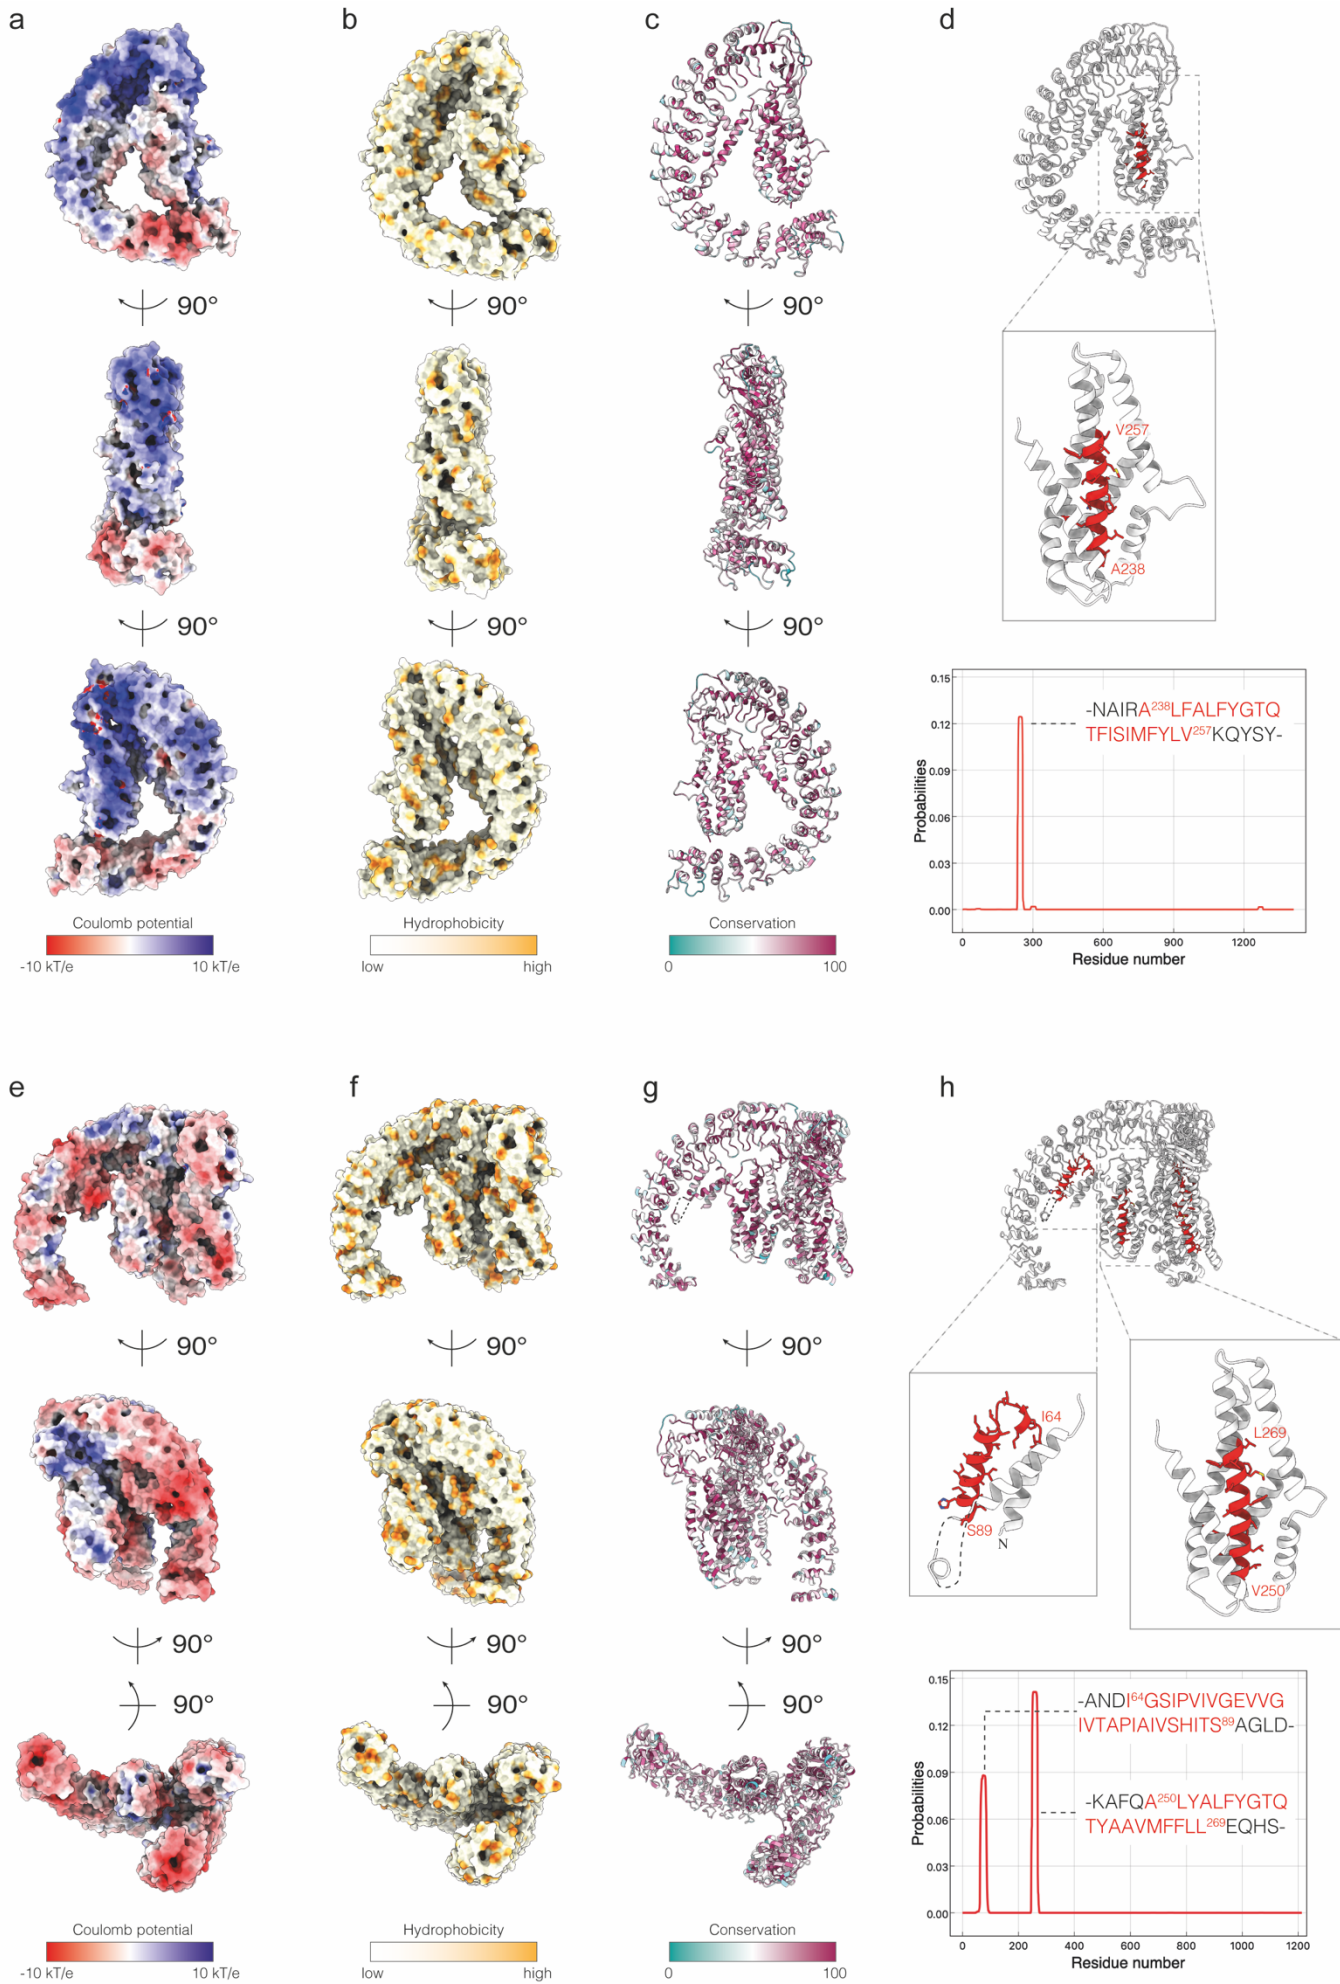

**Supplementary Figure 6. Comparative analysis of the biophysical properties and topology of the predicted transmembrane helices** **a**, Surface electrostatics of the  $\alpha$ -LCT monomer at pH 7.2 calculated in APBS. Red: -10 kT/e; Blue: +10 kT/e. **b**, Surface hydrophobicity. White: low; Yellow: high **c**, Amino acid conservation. Maroon: fully conserved positions; Cyan: no conservation. **d**, The putative transmembrane region (red) of  $\alpha$ -LCT predicted by TMHMM Server v. 2.0. **e-h**, The same structural analysis performed for the  $\delta$ -LIT protomer extracted from the molecular model of the dimer. Notice there are two transmembrane regions predicted from the  $\delta$ -LIT sequence.

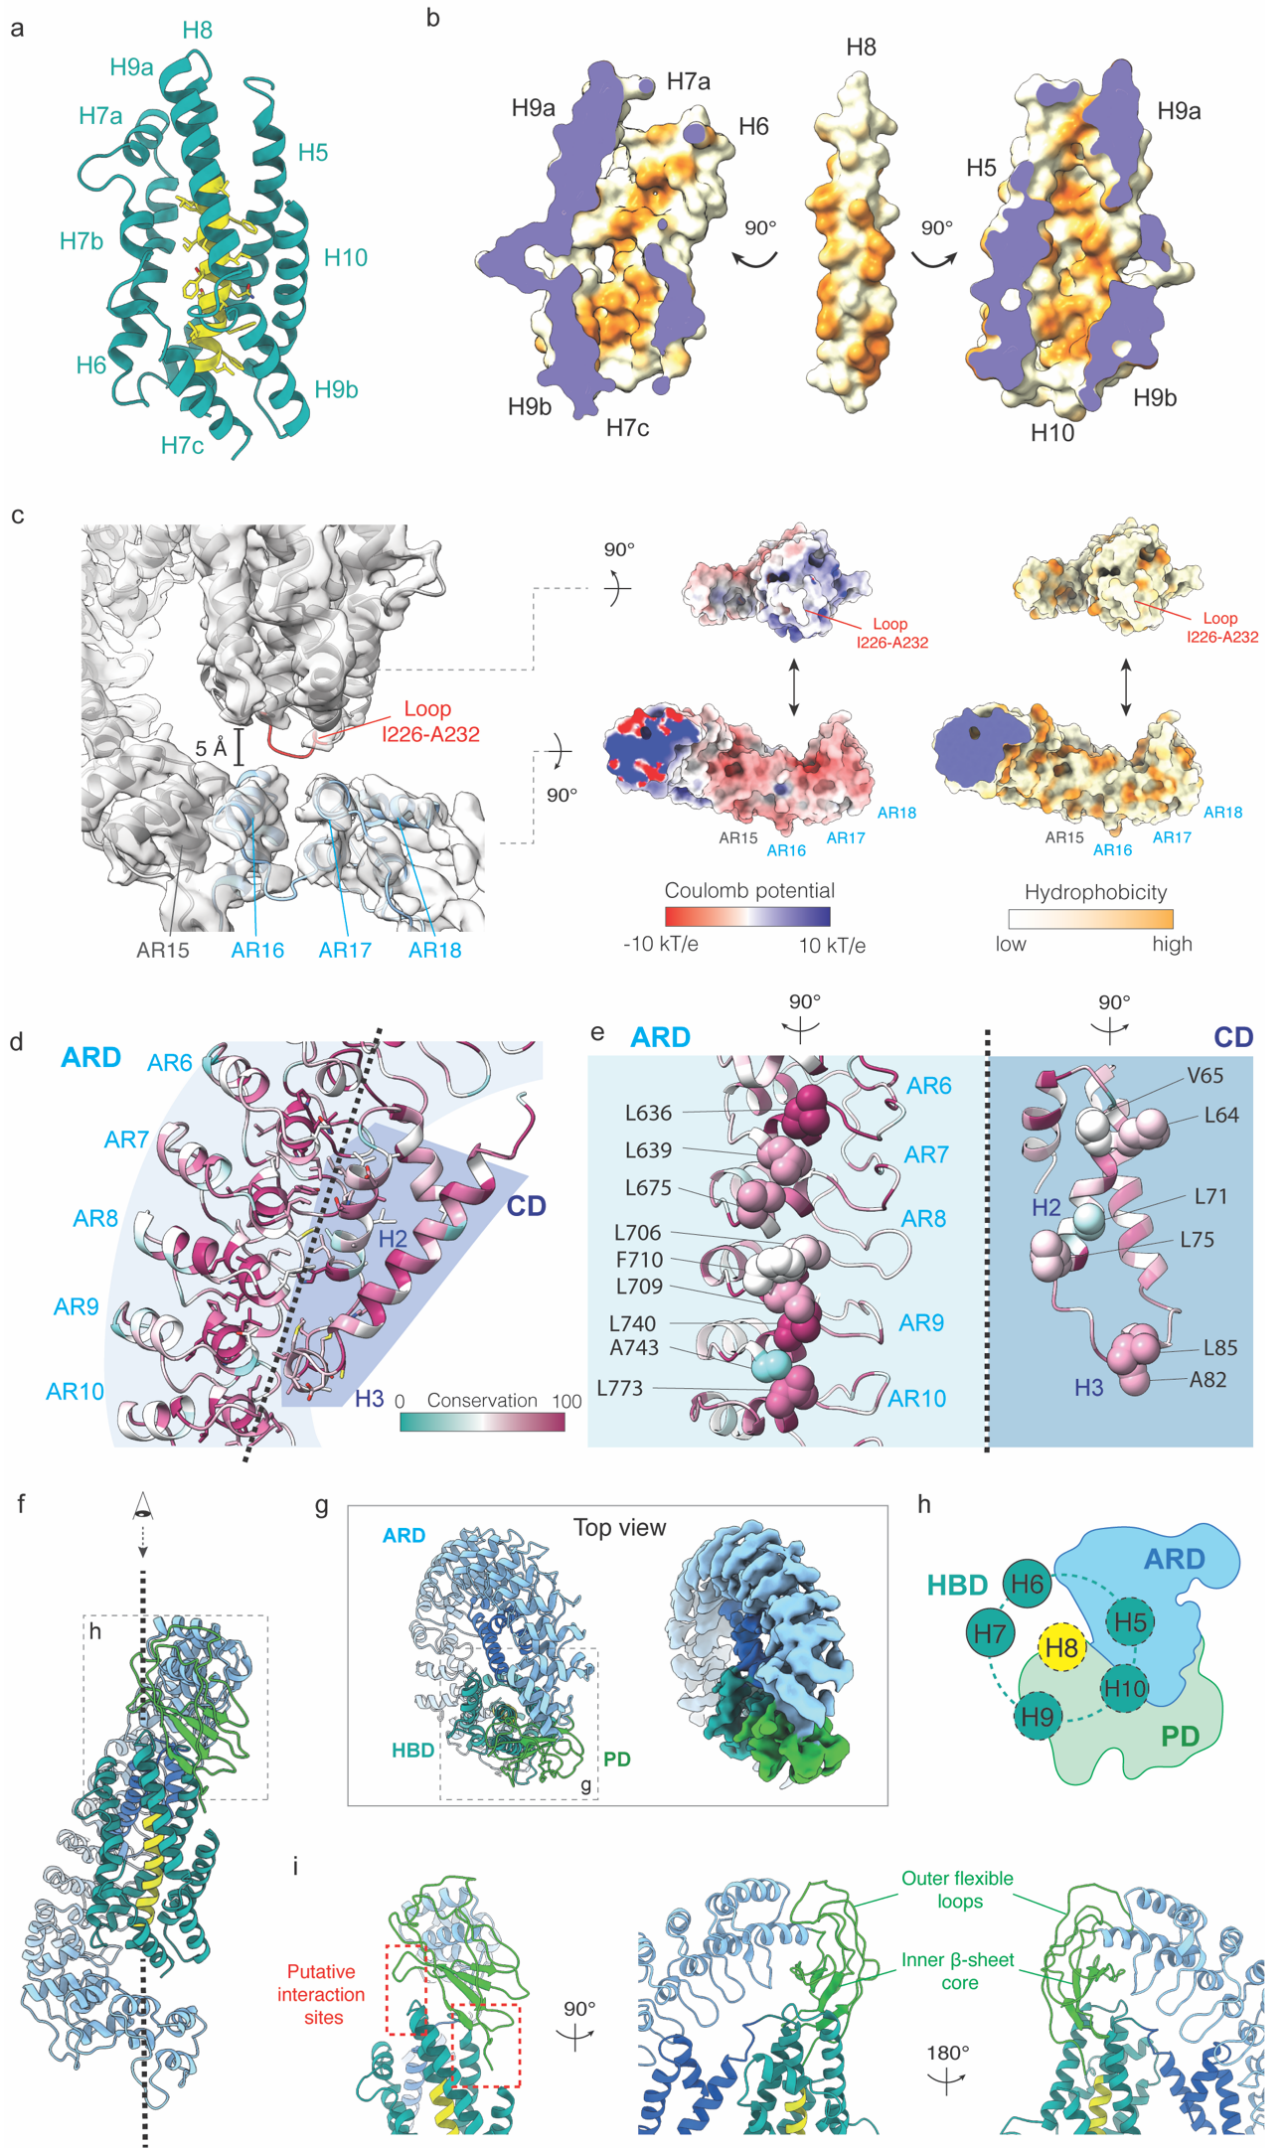

**Supplementary Figure 7. Structural characteristics of  $\alpha$ -LCT** **a**, Close-up view of the HBD. Helix H9 is shown in the front. **b**, The hydrophobic pocket formed by the HDB. The center helix H8 is shown in the same orientation as **a**, together with sliced views of the pocket formed by the outer helices of the bundle, displaying the hydrophobic surface potential. White: low; Yellow: high. **c**, Surface electrostatics and hydrophobicity of the interface between the HBD and ARD. The close-up view of the interface is shown by a model (red: missing loop between the H7 and H8; blue: AR16-18) superposed with the EM map contoured at  $10\sigma$ . The electrostatic potential was calculated at pH 7.2 in APBS. Red: -10 kT/e; Blue: +10 kT/e, and the hydrophobicity was calculated in ChimeraX. White: low; Yellow: high **d**, Close-up view of the CD-ARD interface. Ribbons are colored by conservation. **e**, Side views of the interface between ARD and CD. ARD and CD are rotated 90 degrees to the left and right, respectively. The residues which are considered to contribute to the hydrophobic interaction are shown as spheres. **f,g**, Side (**e**) and top (**f**) view of  $\alpha$ -LCT monomer. The center helix (H8) of HBD in (**e**) is aligned to the vertical axis. The EM map showed in **f** is contoured at  $16\sigma$ . **h**, A schematic diagram of the HBD-ARD-PD interface. The upper side of HBD is partially covered by the PD and ARD. **i**, Close-up view of the PD. The putative interaction sites with HBD (left) and the overall two-layer structure of PD, i.e., the flexible loops and the  $\beta$ -sheet core, are indicated. PD:plug domain; HBD:helical bundle domain; CD:connector domain; ARD:ankyrin-like repeat domain

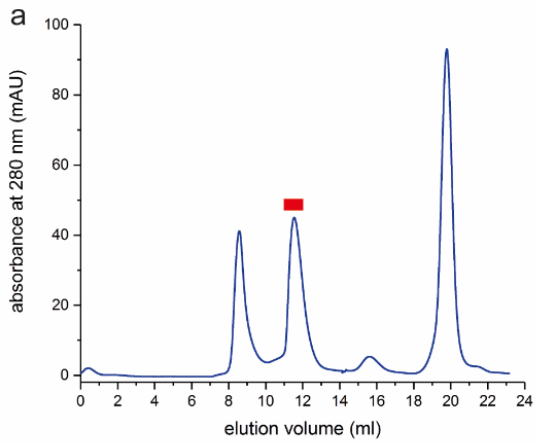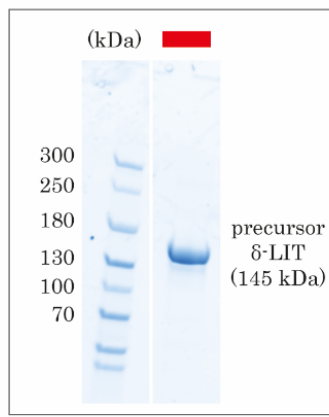

Subjected to structural analysis

**b** Negative stain EM image

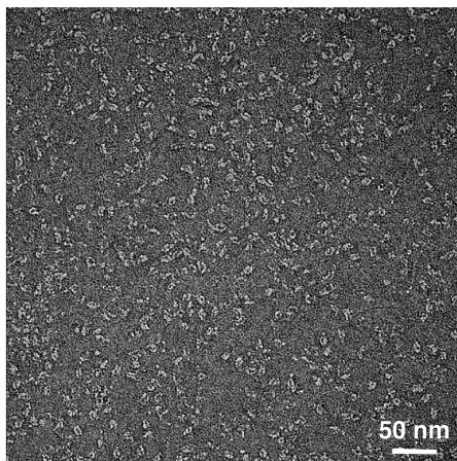

**c** Negative Stain EM 2D class averages

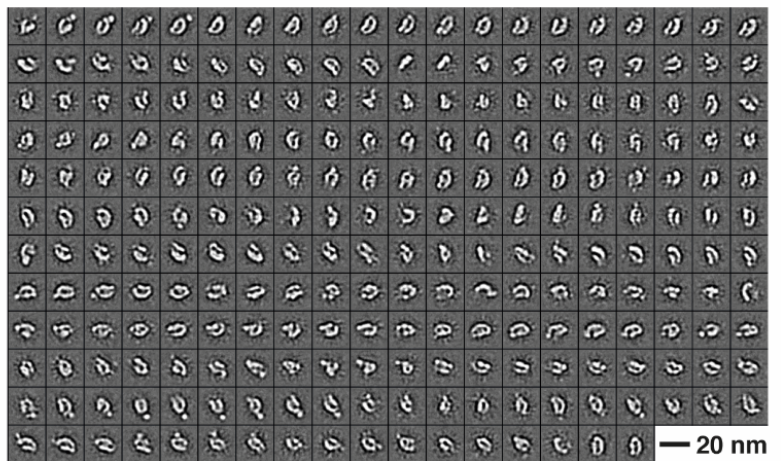

**d** CryoEM image

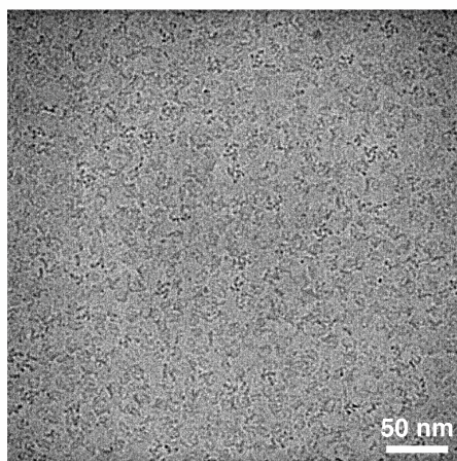

**e** CryoEM subset **monomer** (45%)

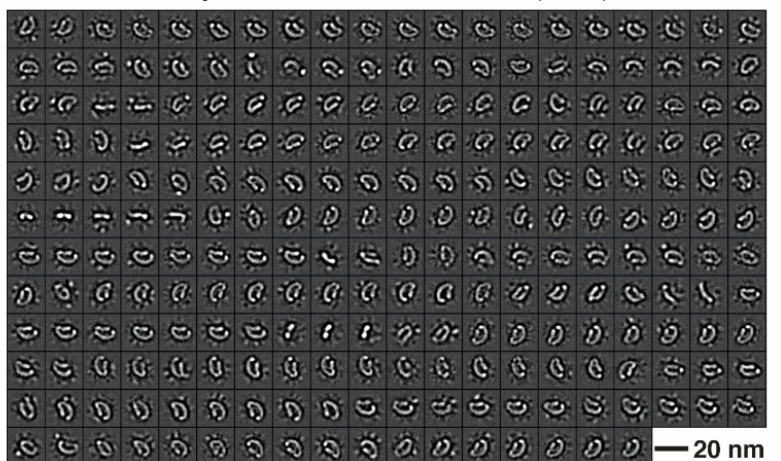

**f** CryoEM subset **dimer** (50%)

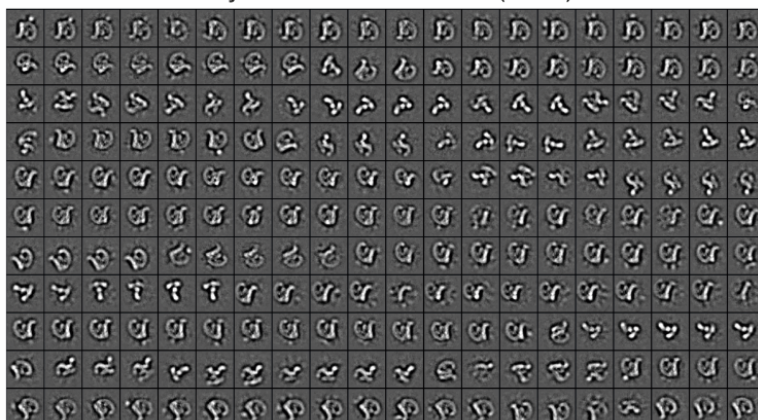

**g** CryoEM subset **trimer** (2.5%)

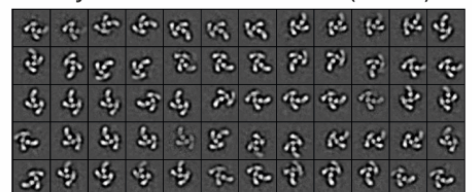

**h** CryoEM subset **tetramer** (2.5%)

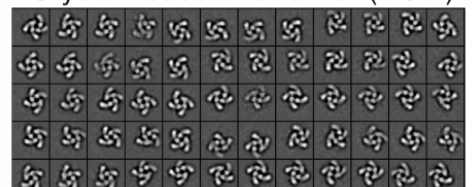

**Supplementary Figure 8. Sample preparation, image acquisition, and data processing of the  $\delta$ -LIT dataset (precursor, full-length).** **a**, Size exclusion chromatography (SEC) profile of  $\delta$ -LIT. The sample subjected to subsequent cryoEM analysis is indicated (red bar) and confirmed with SDS-PAGE. A total of n=3 equivalent experiment have been conducted. **b**, A representative negative stain micrograph of  $\delta$ -LIT. A total of n=100 equivalent images have been collected. **c**, Representative reference free 2D class averages. **d**, A representative cryoEM micrograph of  $\delta$ -LIT. A total of n=2,337 equivalent images have been collected. **e-h**, Representative reference free 2D class averages of monomer (e), dimer (f), trimer (g), and tetramer (h).

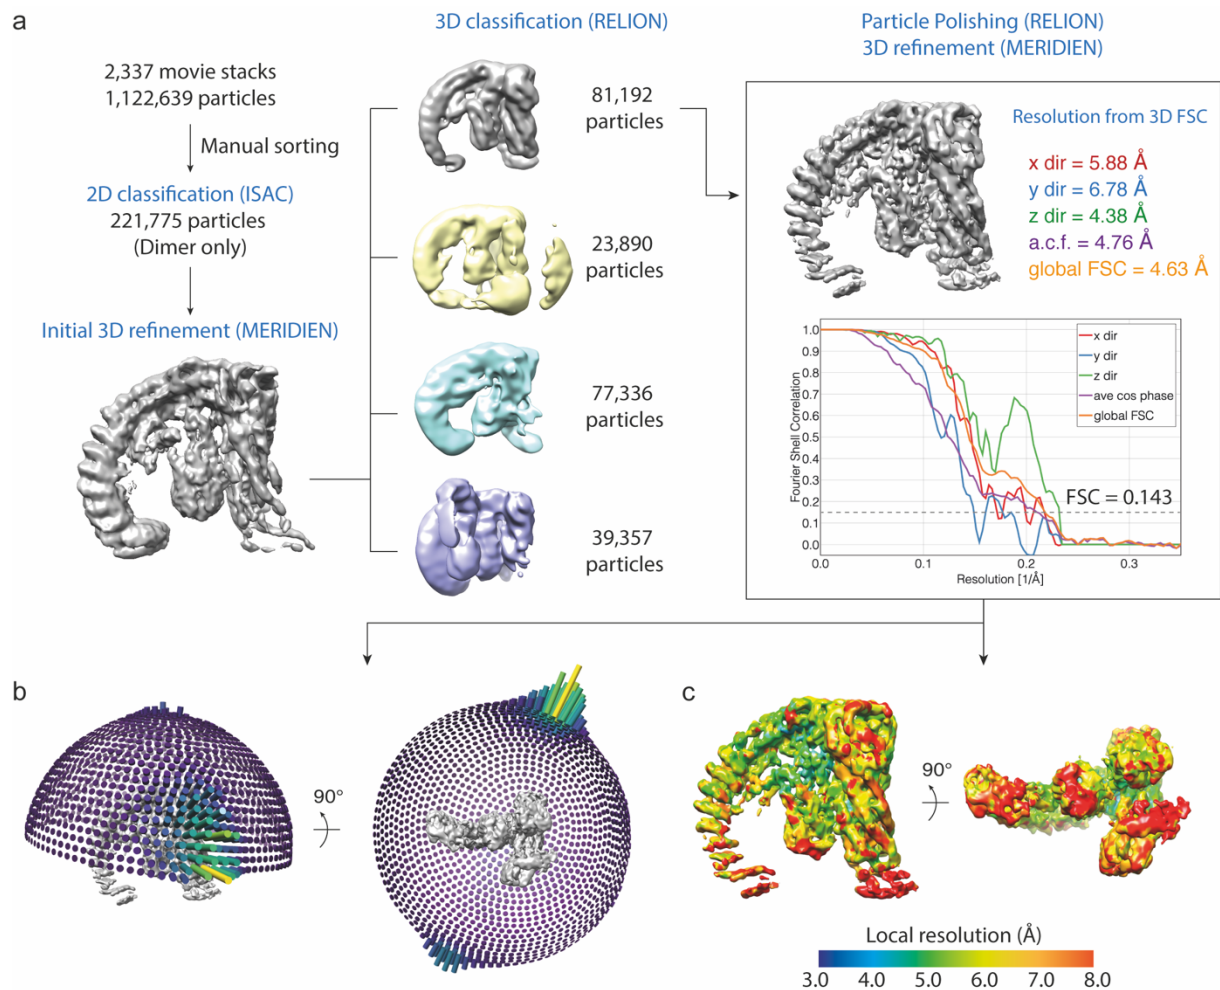

**Supplementary Figure 9. CryoEM processing of  $\delta$ -LIT dimer subset.** **a**, Flowchart of data processing steps. See ‘data processing’ section in Methods for further details. **b**, Angular distribution for the final reconstruction of the  $\delta$ -LIT dimer **c**, CryoEM density map of  $\delta$ -LIT dimer colored by local resolution.

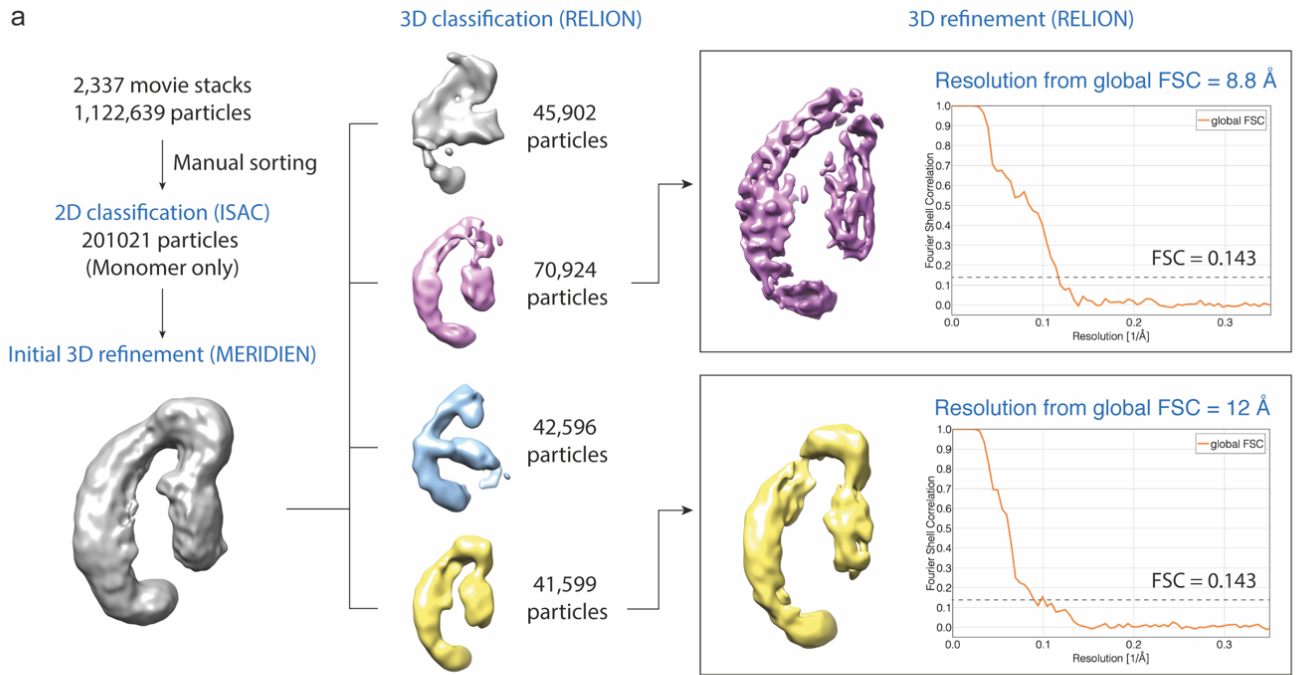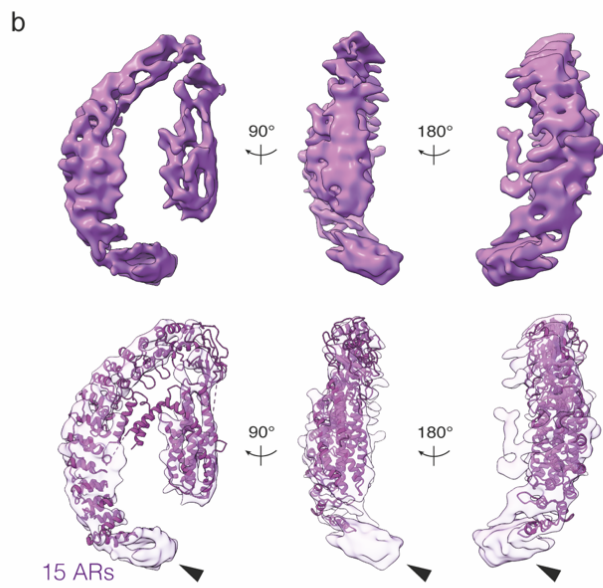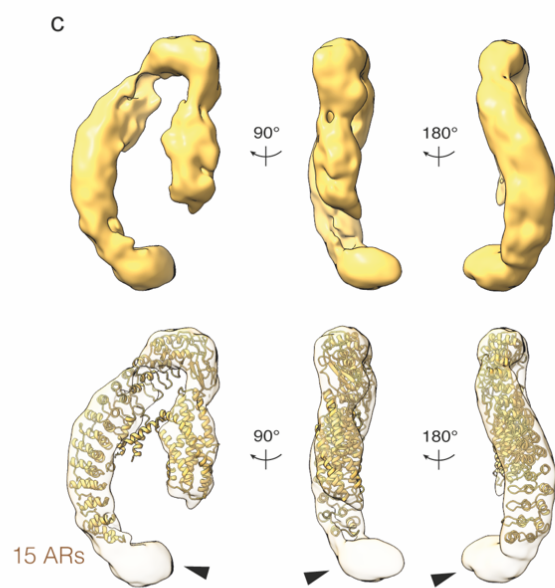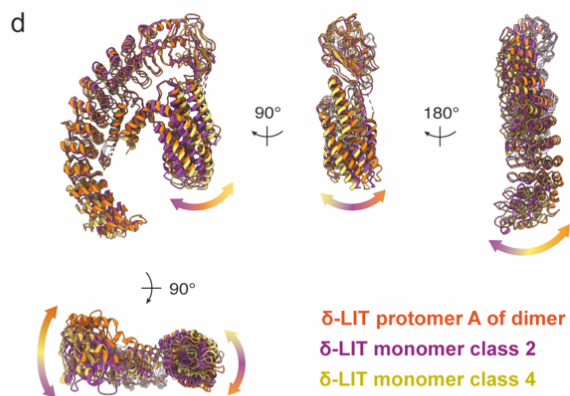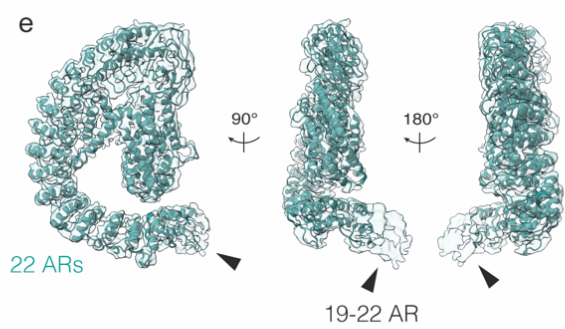



**Supplementary Figure 10. CryoEM processing and structural analysis of  $\delta$ -LIT monomer. a,** Flowchart of data processing steps. See 'data processing' section in Methods for further details. **b-c,** Final maps (upper row) upon refinement of particles of classes 2 (purple) and 4 (orange). Rigid body fitting of the molecular model of  $\delta$ -LIT (obtained by the cryoEM reconstruction of the dimer) into the low-resolution monomer maps (lower row). The EM maps showed are contoured at  $6\sigma$ . Additional densities corresponding to the C-terminal inhibitory domain are indicated by black arrows. **d,** Superposition of the molecular model of the protomer A (orange) of  $\delta$ -LIT dimer with the models of the individual monomers. **e,** For direct comparison, the EM map and model of mature truncated  $\alpha$ -LCT are shown. In this case, the black arrows indicate the terminal ARs 19-22.

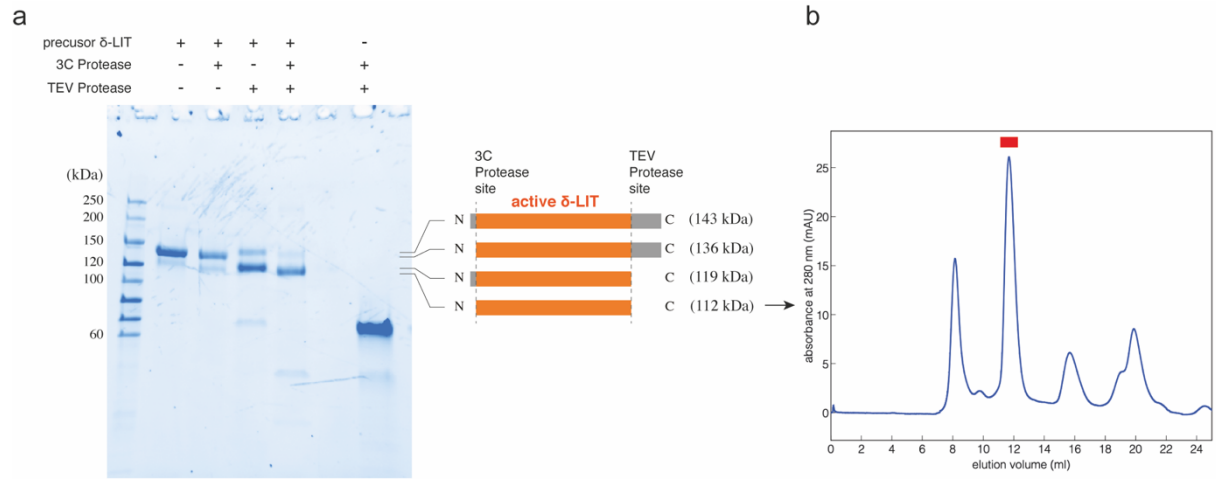

**Supplementary Figure 11. Sample preparation of mature, truncated  $\delta$ -LIT.** **a**, SDS-PAGE of the  $\delta$ -LIT sample after activation by proteolytic cleavage (lane 5) with negative controls. A total of  $n=3$  equivalent experiment have been conducted. The expected primary structures and molecular weights are indicated. **b**, SEC profile of the sample after proteolytic cleavage. The third peak (red bar) was pooled and used for the following electrophysiologic analysis.

### Current traces of precursor $\delta$ -LIT 150/150 mM KCl and 10/1 mM $\text{CaCl}_2$

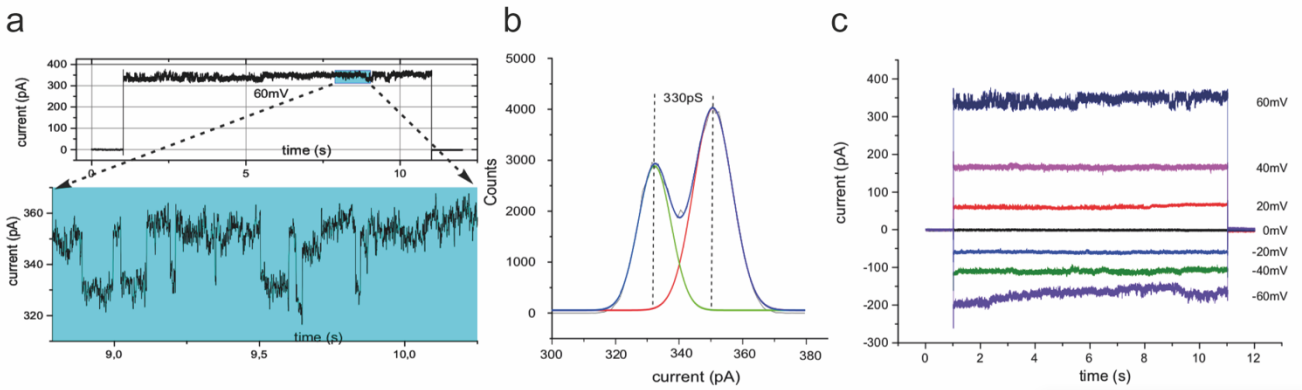

### Current traces of mature $\delta$ -LIT 250/25 mM KCl and 5/0 mM $\text{CaCl}_2$

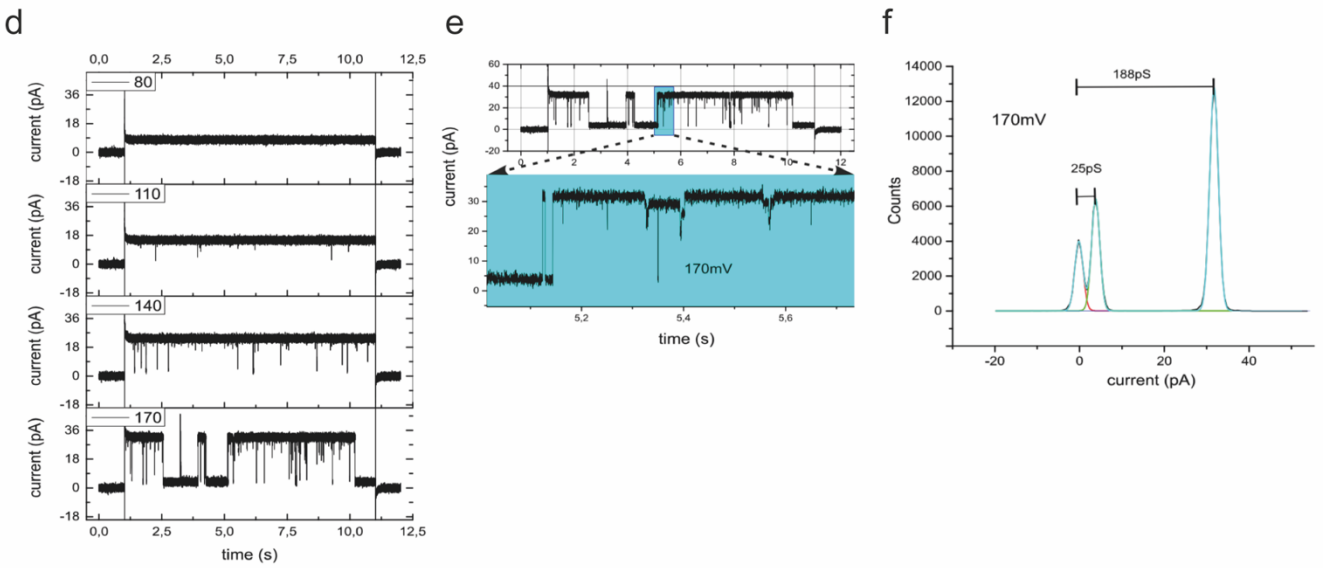

### Electrophysiological characterization of mature $\alpha$ -LCT 150/150 mM KCl and 10/1 mM KCl

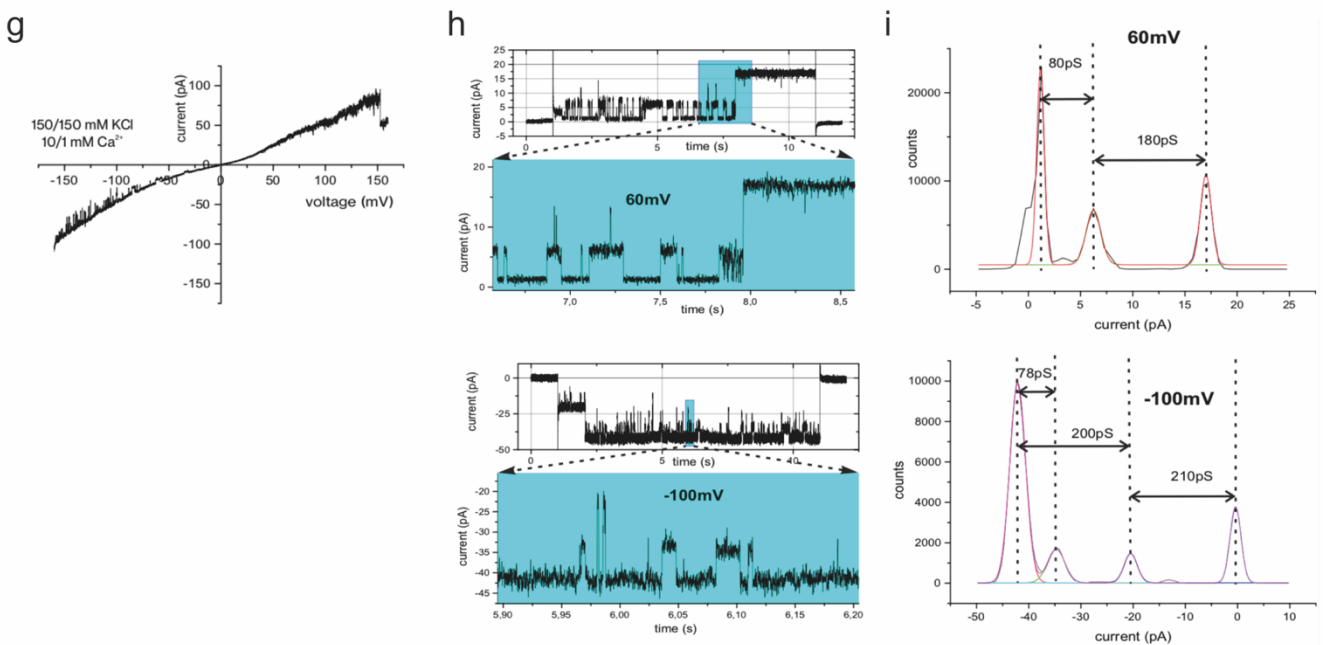

**Supplementary Figure 12. Electrophysiological analysis of latrotoxins.** **a**, Current recording and expansion plot from a bilayer containing the precursor  $\delta$ -LIT in symmetrical 150/150 mM KCl (cis/trans) and 10/1 mM  $\text{CaCl}_2$  buffer (cis/trans) in response to a voltage gate with  $V_{\text{cmd}}=60\text{mV}$ . **b**, All point current amplitude histogram from the record in **(a)**. **c**, Current recordings from a bilayer containing the precursor  $\delta$ -LIT in symmetrical 150/150 mM KCl and 10/1 mM  $\text{CaCl}_2$  buffer (cis/trans) in response to voltage gates with the indicated amplitudes. A total of  $n=12$  recordings similar to **(c)** from 3 different precursor  $\delta$ -LIT preparations have been conducted. Remarkably precursor  $\delta$ -LIT channel gating was rather unstructured and noisy with fast current transitions which could not be clearly resolved in amplitude or time **(a,c)**. Using a simplified cylindrical model this  $\bar{G}_{\text{main}}$  would correspond to a pore restriction diameter of about  $1.5 \text{ nm}^{1,2}$  **(c)** **d**, Current recording from a bilayer containing the reconstituted mature  $\delta$ -LIT in asymmetric 250/25 mM KCl and 5/0 mM  $\text{CaCl}_2$  (cis/trans) buffer at the indicated  $V_{\text{cmd}}$ . A total of  $n=15$  recordings similar to **(d)** at positive and negative  $V_{\text{cmd}}$  from 3 different  $\delta$ -LIT preparations have been conducted. In comparison to precursor  $\delta$ -LIT at all applied  $V_{\text{cmd}}$  significantly smaller overall currents were observed with the reconstituted  $\delta$ -LIT pointing to a lower membrane incorporation efficiency of the solubilized mature  $\delta$ -LIT protein. In addition, the current traces displayed at the given time-resolution clearly defined low noise gating patterns **(d,e)** **e**, Extension plot of the recording at  $V_{\text{cmd}}=170 \text{ mV}$ . **f**, All point current amplitude histogram at  $V_{\text{cmd}}=170 \text{ mV}$  of the respective recording in **d**. **g**, Current-voltage ramp recording from a bilayer containing the mature  $\alpha$ -LCT in 150/150 mM KCl and 10/1 mM  $\text{CaCl}_2$  (cis/trans) buffer revealing a slightly rectifying shape. A total of  $n=9$  recordings similar to **(g)** from 3 different  $\alpha$ -LCT preparations have been conducted. **h**, Current recording and extension plot in response to voltage gates of  $V_{\text{cmd}}= 60 \text{ mV}$  and  $V_{\text{cmd}}=-100 \text{ mV}$ . A total of  $n=9$  recordings similar to **(h)** at positive and negative  $V_{\text{cmd}}$  from 3 different  $\alpha$ -LCT preparations have been conducted. **i**, Corresponding all point current amplitude histogram at  $V_{\text{cmd}}= 60\text{mV}$  and  $-100\text{mV}$  revealing two open channel conductance states.

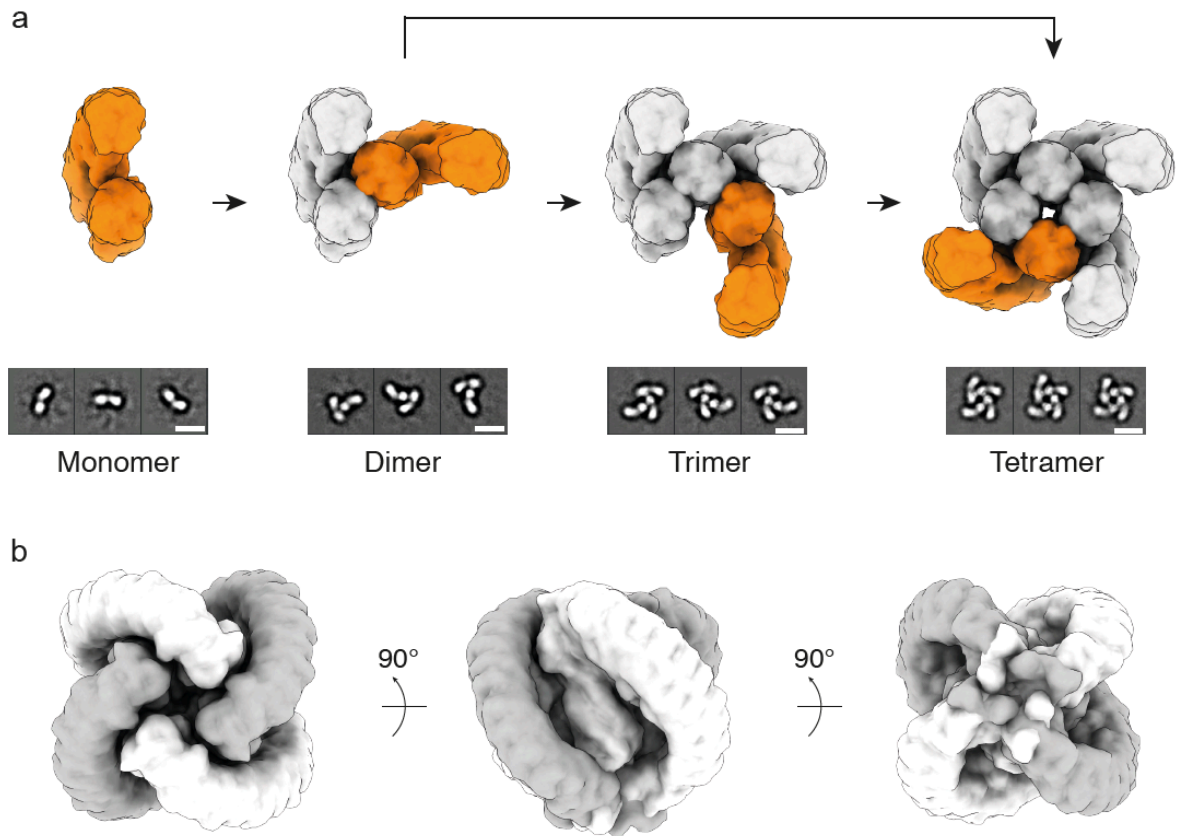

**Supplementary Figure 13. a**, Proposed sequential circular mechanism of tetramer formation of latrotoxin via 1/2/3 mers. Representative 2D classes of each oligomer state from the present  $\delta$ -LIT dataset are shown below the respective densities of simulated volumes filtered to 10 Å. **b**, Simulated volume of a tetramer assembled from “compact” state  $\alpha$ -LCT monomers to demonstrate the mismatch to the 2D class averages of  $\delta$ -LIT tetramers (see a) and the clashes between the AR domains. According to our model, conformational changes from the “compact” to “extended” state take place already during dimer formation and not after tetramer formation.

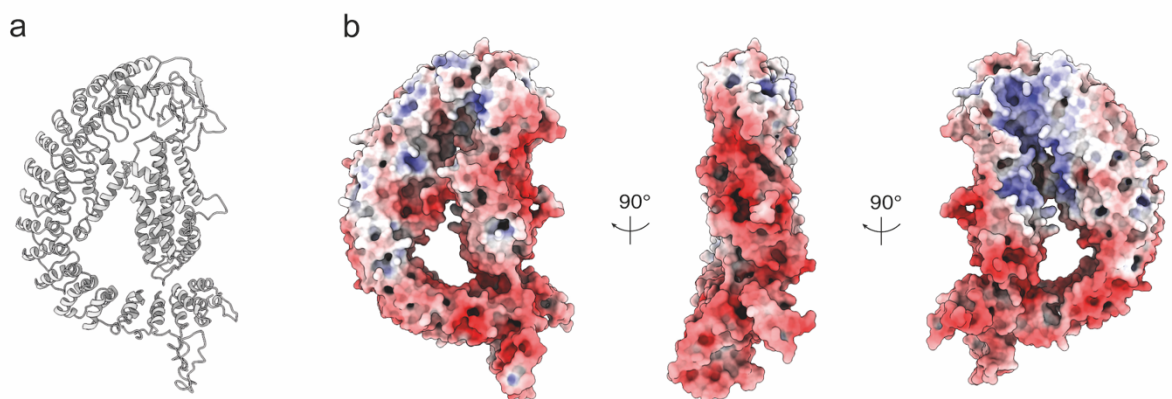

**Supplementary Figure 14. Surface electrostatics of  $\alpha$ -LTX a**, Homology model of  $\alpha$ -LTX based on the  $\alpha$ -LCT monomer structure generated by SWISS-MODEL, using  $\alpha$ -LCT as reference. **b**, Surface electrostatics of the  $\alpha$ -LTX homology model at pH 7.2 calculated in APBS. Red: -10 kT/e; Blue: 10 kT/e.

# $\alpha$ -LCT

a +1 mM EDTA

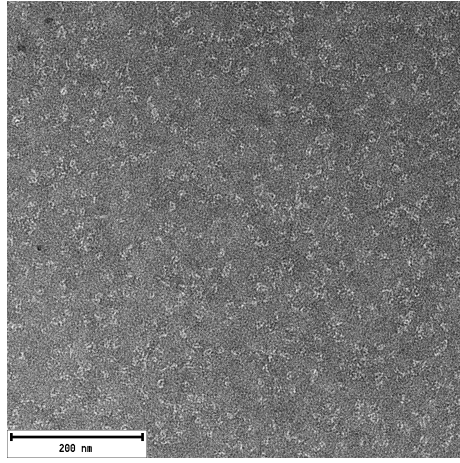

b no EDTA

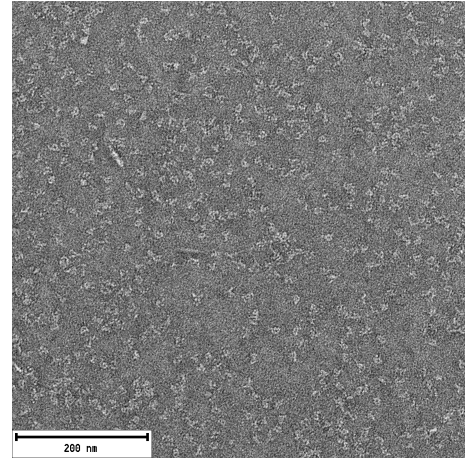

c no EDTA, + 5 mM CaCl<sub>2</sub>

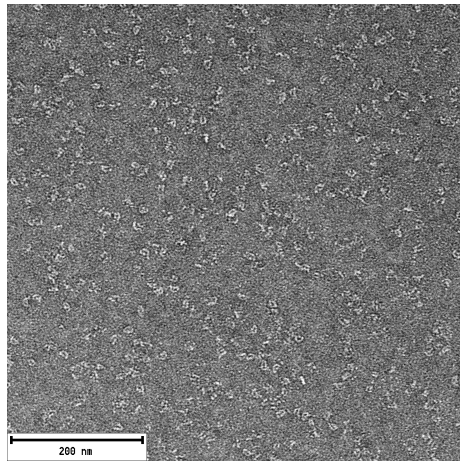

d no EDTA, + 5 mM MgCl<sub>2</sub>

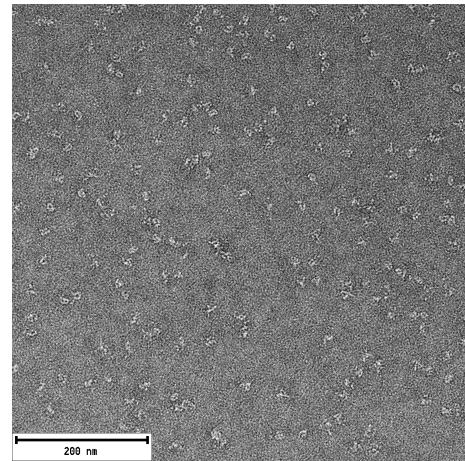

# $\delta$ -LIT

e +1 mM EDTA

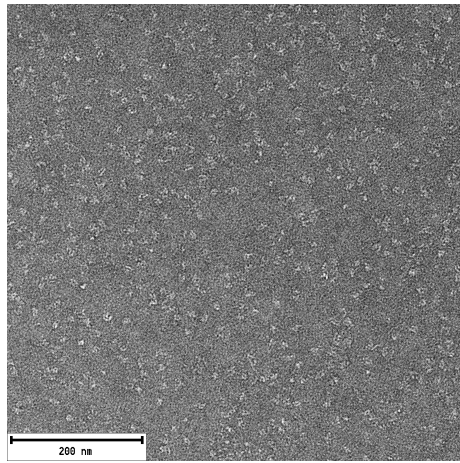

f no EDTA

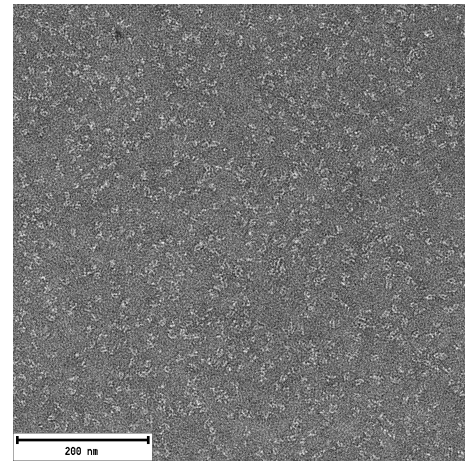

g no EDTA, + 5 mM CaCl<sub>2</sub>

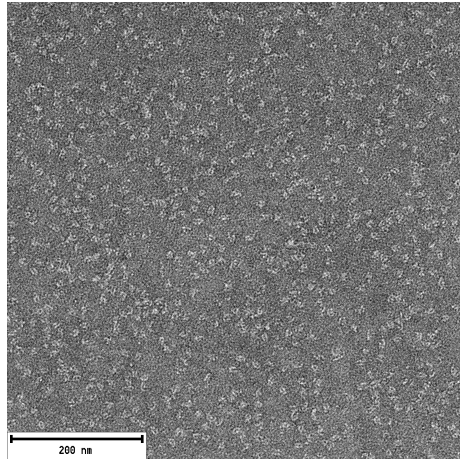

h no EDTA, + 5 mM MgCl<sub>2</sub>

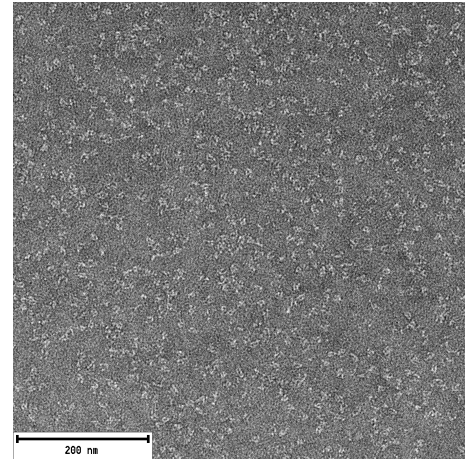

**Supplementary Figure 15. The effect of divalent cations on LTXs** **a**, A representative negative stain micrograph of mature  $\alpha$ -LCT in the presence of 1 mM EDTA. **b**,  $\alpha$ -LCT in the absence of EDTA. **c**,  $\alpha$ -LCT in the absence of EDTA with 5 mM  $\text{CaCl}_2$ . **d**,  $\alpha$ -LCT in the absence of EDTA with 5 mM  $\text{MgCl}_2$ . **e**, mature  $\delta$ -LIT in the presence of 1 mM EDTA. **f**,  $\delta$ -LIT in the absence of EDTA. **g**,  $\delta$ -LIT in the absence of EDTA with 5 mM  $\text{CaCl}_2$ . **h**,  $\delta$ -LIT in the absence of EDTA with 5 mM  $\text{MgCl}_2$ . A total of  $n=10$  equivalent images of each condition have been collected. All the protein samples were adjusted to approximately 0.015 mg/ml and incubated with according additives in the presence of 100 mM Tris-HCl pH 8.0 and 150 mM NaCl at R.T. for 30 min. The negative stain EM images were acquired with a 120 kV FEI Tecnai Spirit TEX (Thermo Fisher Scientific) at a magnification of 67,000 x. Scale bar: 200 nm

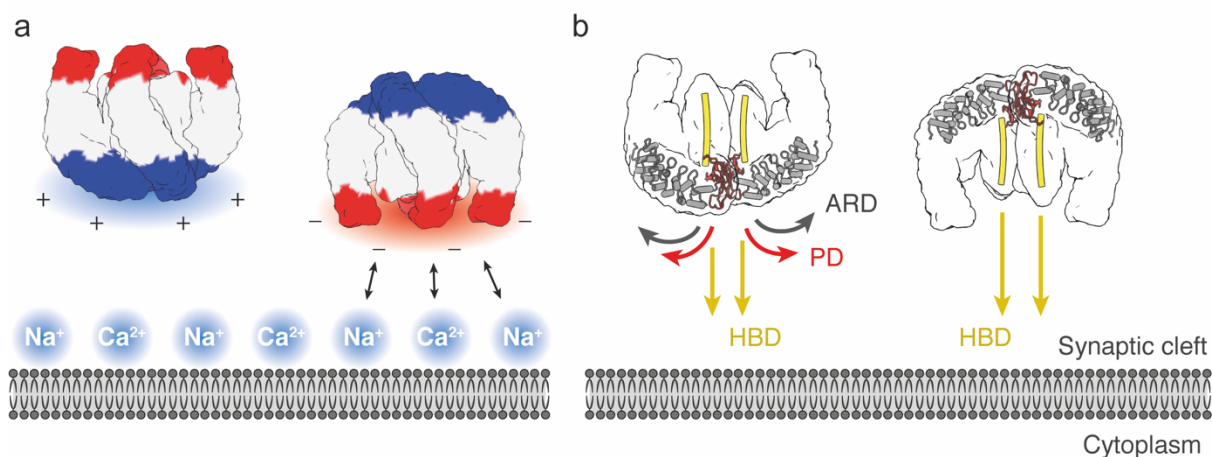

**Supplementary Figure 16. Possible orientation of soluble LaTX tetramers towards the presynaptic membrane prior pore formation. Two alternative scenarios are shown side-by-side in a and b. a,** The cartoon scheme of the toxin is colored according to its bipolar charge distribution. The toxin is orientated with the “claw”-tips (AR-tails) (right-image) or “claw”-head (oligomerization interface) facing the presynaptic membrane. **b,** Ribbon drawings of the predicted putative transmembrane helices of the helical bundle domain (HBD) (yellow), and the domains involved in the oligomerization interface (plug domain (PD, red) and AR1-6 of the AR-domain (ARD, Gray) are shown. Arrows indicate possible re-arrangements of domains required to allow interactions of the HBD with the membrane.



### Protomer A

| Domain | helix | residue |
|--------|-------|---------|
| HBD    | H9    | Asp310  |
|        |       | Ser304  |
|        |       | Asp300  |
|        |       | ILE297  |

### Protomer B

| residue | helix | Domain |
|---------|-------|--------|
| Lys184  | H6    | HBD    |
| Arg188  |       |        |
| Leu192  |       |        |
| Lys200  | H7a   |        |
| Ala199  |       |        |

|        |        |
|--------|--------|
| PD     | Lys435 |
|        | Lys434 |
|        |        |
|        |        |
|        | Pro433 |
|        |        |
|        |        |
|        | Val431 |
|        | Arg430 |
|        |        |
|        |        |
|        | Lys428 |
|        |        |
|        | Ser371 |
|        | Glu372 |
|        | Val373 |
|        |        |
|        | Asn374 |
|        | Phe375 |
|        | Pro376 |
| Asn377 |        |
| Gln381 |        |
| Val419 |        |
| Gln420 |        |
| Gly421 |        |

|        |     |    |
|--------|-----|----|
| Val74  | H2  | CD |
| Glu649 | AR6 |    |
| Asn648 |     |    |
| ILE647 |     |    |
|        | AR5 |    |
| Ser615 |     |    |
| Met614 | AR4 |    |
| Phe583 |     |    |
| Ser581 |     |    |
| Arg580 | AR3 |    |
| Glu546 |     |    |
| Ala547 | AR3 |    |
|        |     |    |
| Gln549 |     |    |
| Arg512 | AR2 |    |
| Tyr511 |     |    |
|        | AR1 |    |
| ILE476 |     |    |
| Asn477 |     |    |
| Lys478 |     |    |
| Lys480 |     |    |

**Supplementary Table 1.** Residues which are considered to contribute to dimerization. The spatially adjacent residues are indicated with the same color in the table. The helices and domains where the residues are located are also indicated.

| Oligo name                       | Sequence                                                |
|----------------------------------|---------------------------------------------------------|
| $\delta$ LIT-delDomianI-forward  | gcatgggacgaggaagatggtgaaatgacc                          |
| $\delta$ LIT- delDomianI-reverse | tcttcctcgtcccatggcgggcccctgaaa                          |
| $\delta$ LIT-TEVsite-forward     | gaaaacctgtatttcagggcagcatcgttaaagaaaccaacagccgttatctgcc |
| $\delta$ LIT-TEVsite-reverse     | gctgccctgaaaatacaggtttcctccggcaggtacgacgaaac            |

**Supplementary Table 2. Primer sequences used to producing the mature  $\delta$ -LIT.**

**$\alpha$ -LCT monomer** **$\delta$ -LIT dimer****Data collection and processing**

|                                         | Titan Krios (X-FEG, Cs 2.7 mm) | Titan Krios (X-FEG, Cs -corrected) |
|-----------------------------------------|--------------------------------|------------------------------------|
| Microscope                              | GIF Quantum / 20               | GIF Quantum / 20                   |
| Energy filter / Slit width (eV)         | 300                            | 300                                |
| Voltage (kV)                            | -1.3 to -2.5                   | -1.3 to -2.4                       |
| Defocus range (um)                      | K3 super-res.                  | K3 super-res.                      |
| Camera                                  | 0.45 / 0.9                     | 0.45 / 0.9                         |
| Pixel size (Å) <sup>a</sup>             | 69                             | 58                                 |
| Total electron dose (e/Å <sup>2</sup> ) | 3                              | 3                                  |
| Exposure time (sec)                     | 60                             | 60                                 |
| Frames per movie                        | 10,439                         | 2,339                              |
| Nr. of images                           | 2,735,530                      | 1,122,639                          |
| Initial Nr. of particles                | 376,474                        | 81,192                             |
| Final Nr. of particles                  | 4.03                           | 4.63                               |
| Map resolution (Å) <sup>b</sup>         | 216.70                         | 75.01                              |
| B-factor for sharpening                 |                                |                                    |

<sup>a</sup>Pixel size after 2x binning used for processing

<sup>b</sup>Global resolution calculated at the 'gold standard' 0.143 criterion

**Atomic model**

|                           |       |       |
|---------------------------|-------|-------|
| Non-hydrogen atoms        | 7655  | 13435 |
| Protein residues          | 1000  | 1715  |
| Ligands                   | N/A   | N/A   |
| r.m.s.d. Bond length      | 0.003 | 0.003 |
| r.m.s.d. Bond angles      | 0.756 | 0.681 |
| All-atoms clash score     | 19.10 | 24.08 |
| Rotamer outliers (%)      | 0     | 0     |
| Ramachandran outliers (%) | 0     | 0     |
| Ramachandran allowed (%)  | 10.56 | 10.89 |
| Ramachandran favored (%)  | 89.44 | 89.11 |
| MolProbity score          | 2.34  | 2.45  |

**Supplementary Table 3. CryoEM data collection and refinement statistics.**

## Supplementary References

- 1 Hille, B. *Ionic Channels of Excitable Membranes*. Vol. 3 (Sinauer Ass. Inc., 2001).
- 2 Smart, O. S., Breed, J., Smith, G. R. & Sansom, M. S. P. A novel method for structure-based prediction of ion channel conductance properties. *Biophysical Journal* **72**, 1109-1126 (1997).
