# Supplementary material for: Molecular architecture of black widow spider neurotoxins
Source: PubMed Central journal article supplement (PMC8630228; doi:10.1038/s41467-021-26562-8), 2021-11-29
Supplement: 41467_2021_26562_MOESM2_ESM.pdf [file 41467_2021_26562_MOESM2_ESM.pdf]

## Description of Additional Supplementary Files

**Supplementary Movie 1.** The cryoEM map and the overall structure of  $\alpha$ -LCT monomer.

**Supplementary Movie 2.** The cryoEM map and the overall structure of  $\delta$ -LIT dimer.

**Supplementary Movie 3.** Putative conformational change during oligomerization. The four conformations, i.e., the “compact” (sea green;  $\alpha$ -LCT), an intermediate (cyan:  $\alpha$ -LCT) and the “extended” state (orange:  $\delta$ -LIT protomer A; gray:  $\delta$ -LIT protomer B) are shown sequentially. The morphing occurs between the “compact” conformation of the  $\alpha$ -LCT monomer and the “extended” conformation of  $\delta$ -LIT protomer B. The conformational change of the overall structure is shown followed by close-up views of the helical bundle-, connector- and AR-domain.
